# Supplementary material for: Composites between Perovskite and Layered Co-Based Oxides for Modification of the Thermoelectric Efficiency
Source: MDPI journal article supplement (doi:10.3390/ma14227019), 2021-11-19
Supplement: s1 [file s1]

# Supplementary Materials: Composites between Perovskite and Layered Co-based Oxides for Modification of the Thermoelectric Efficiency

Sonya Harizanova <sup>1</sup>, Eric Faulques <sup>2</sup>, Benoit Corraze <sup>2</sup>, Christophe Payen <sup>2</sup>, Marcin Zajac <sup>3</sup>, Dorota Wilgocka-Slęzak <sup>4</sup>, Józef Korecki <sup>3,4</sup>, Genoveva Atanasova <sup>1</sup> and Radostina Stoyanova <sup>1,\*</sup>

<sup>1</sup> Institute of General and Inorganic Chemistry, Bulgarian Academy of Sciences, 1113 Sofia, Bulgaria; sonya@svr.igic.bas.bg (S. H); genoveva@svr.igic.bas.bg (G.A.); radstoy@svr.igic.bas.bg (R.S.)

<sup>2</sup> University of Nantes, CNRS, Institut des Matériaux Jean Rouxel, IMN, F-44000 Nantes, France; Eric.Faulques@cnrs-imn.fr (E.F); Benoit.Corraze@cnrs-imn.fr (B.C.); christophe.payen@cnrs-imn.fr (C.P.)

<sup>3</sup> National Synchrotron Radiation Centre Solaris, 30-392 Kraków, Poland; mar.zajac@uj.edu.pl (M.Z.), jozef.korecki@ikifp.edu.pl (J.K.)

<sup>4</sup> Jerzy Haber Institute of Catalysis and Surface Chemistry, Polish Academy of Sciences, 30-239 Kraków, Poland; dorota.wilgocka-slezak@ikifp.edu.pl (D.-W.S.)

\* Correspondence: radstoy@svr.igic.bas.bg; Tel.: +35929793915.

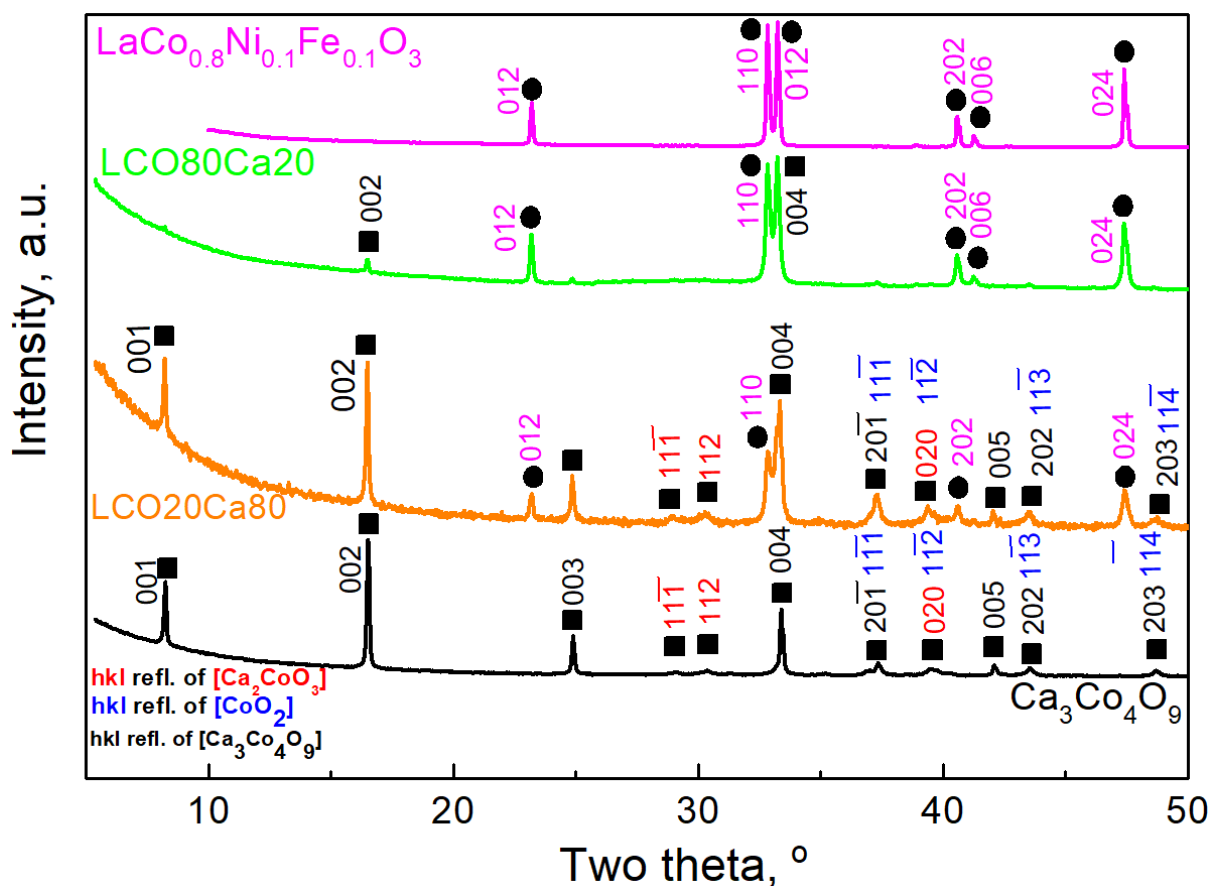

**Figure S1.** XRD patterns of individual components  $\text{LaCo}_{0.8}\text{Ni}_{0.1}\text{Fe}_{0.1}\text{O}_3$  and  $\text{Ca}_3\text{Co}_4\text{O}_9$  and composites between them LCO80Ca20 and LCO20Ca80. Bragg reflections for the perovskite,  $[\text{Ca}_2\text{CoO}_3]$  and  $[\text{CoO}_2]$  blocks, and  $[\text{Ca}_3\text{Co}_4\text{O}_9]$  compositions are given. The indexation of XRD patterns is based on the ICSD collection codes for  $\text{LaCoO}_3$  (17668) and  $\text{Ca}_2\text{CoO}_3(\text{CoO}_2)_{1.62}$  (55458). The detailed structural analysis of rhombohedrally distorted perovskite is given elsewhere [1].

**Table S1.** Lattice parameters ( $a$ ,  $c$ ,  $V$ ) for  $\text{LaCo}_{0.8}\text{Ni}_{0.1}\text{Fe}_{0.1}\text{O}_3$ , LCO80Ca20, LCO20Ca80 and  $\text{Ca}_3\text{Co}_4\text{O}_9$  :

| Samples                                                     | Unit cells                 |                            |                   |
|-------------------------------------------------------------|----------------------------|----------------------------|-------------------|
|                                                             | $a \pm 0.0001, \text{\AA}$ | $c \pm 0.0001, \text{\AA}$ | $V, \text{\AA}^3$ |
| $\text{LaCo}_{0.8}\text{Ni}_{0.1}\text{Fe}_{0.1}\text{O}_3$ | 5.4532                     | 13.1191                    | 337.86            |
| LCO80Ca20                                                   | ..                         | ..                         | ..                |
| LCO20Ca80                                                   | ..                         | ..                         | ..                |

  

| Samples                            | Unit cells                 |                              |                            |                              |         |                     |                     |
|------------------------------------|----------------------------|------------------------------|----------------------------|------------------------------|---------|---------------------|---------------------|
|                                    | $a \pm 0.0001, \text{\AA}$ | $b_1 \pm 0.0001, \text{\AA}$ | $c \pm 0.0001, \text{\AA}$ | $b_2 \pm 0.0001, \text{\AA}$ | $\beta$ | $V_1, \text{\AA}^3$ | $V_2, \text{\AA}^3$ |
| LCO80Ca20                          | 4.8370                     | 4.5618                       | 10.8960                    | 2.8081                       | 97.7651 | 238.22              | 146.64              |
| LCO20Ca80                          | 4.8398                     | 4.5660                       | 10.8157                    | 2.8020                       | 98.2447 | 236.54              | 145.16              |
| $\text{Ca}_3\text{Co}_4\text{O}_9$ | 4.8249                     | 4.5687                       | 10.8623                    | 2.8096                       | 98.3676 | 236.90              | 145.68              |

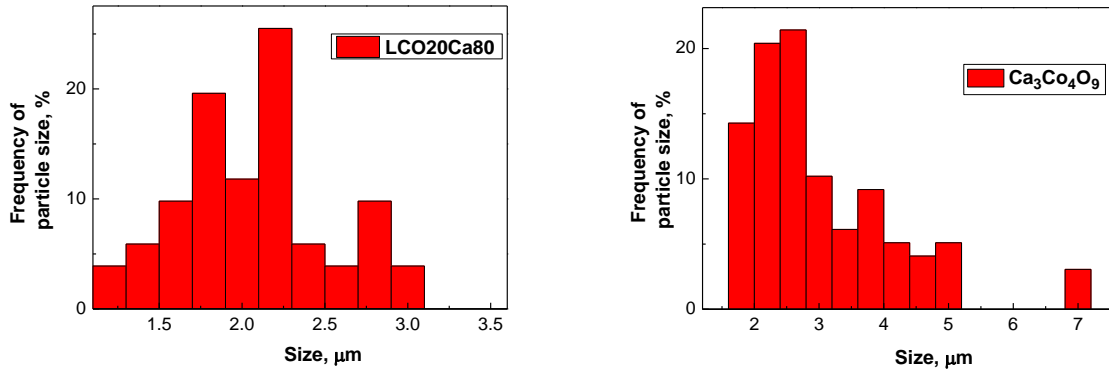

**Figure S2.** Particle size distribution calculated from SEM images of LCO20Ca80 and  $\text{Ca}_3\text{Co}_4\text{O}_9$ .

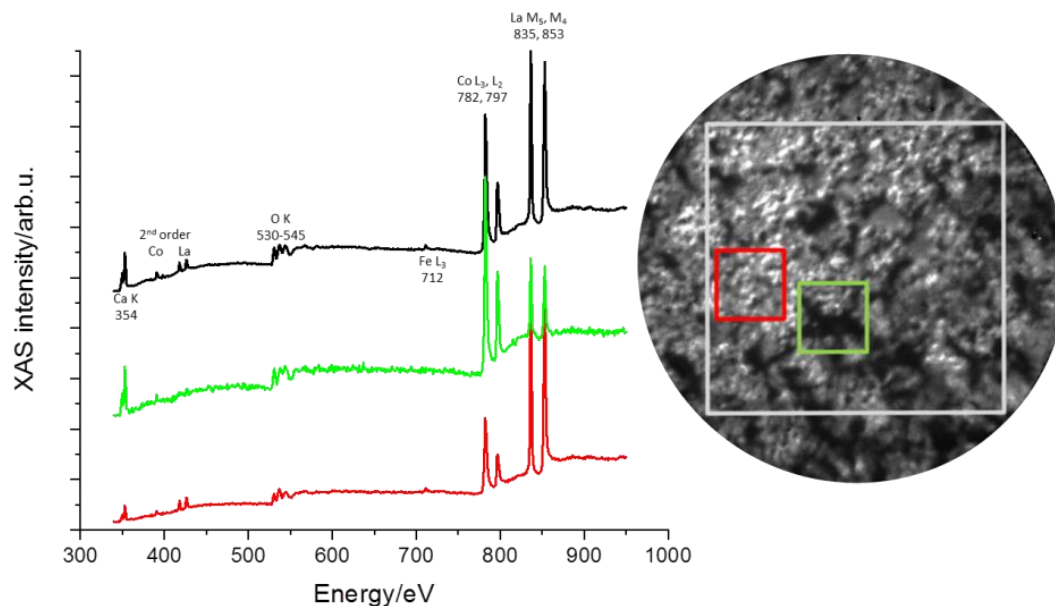

**Figure S3.** XAS spectra for the LCO20Ca80 composite taken from the areas marked with corresponding squares in the accompanying image. The image is taken at an energy close to the Co-L3 edge, the field of view is 75  $\mu\text{m}$ . With the top spectrum, integrated over the big grey square, adsorption edges are identified. Small features at half-energies of the Co and La edges are due to the second order diffraction at monochromator. The red spectrum, with dominating La-intensity, shows that the fine-grain structure areas are perovskite-rich. The green spectrum, with considerable contribution from dark low intensity area, identified as a void, indicates domination of Ca and Co rich layered oxide.

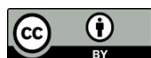

© 2021 by the authors. Submitted for possible open access publication under the terms and conditions of the Creative Commons Attribution (CC BY) license (<https://creativecommons.org/licenses/by/4.0/>).
